# Supplementary material for: (E)-1,2-Diphenylethene-based conjugated nanoporous polymers for a superior adsorptive removal of dyes from water
Source: Royal Society of Chemistry journal article supplement (doi:10.1039/d1nj04287d), 2021-01-01
Supplement: d1nj04287d1.pdf [file d1nj04287d1.pdf]

**Electronic Supplementary Information (ESI)**

**(*E*)-1,2-Diphenylethene-based conjugated nanoporous polymers for  
superior adsorptive removal of dye from water**

Ahmed F. Saber<sup>a</sup> and Ahmed F. M. EL-Mahdy<sup>\*a</sup>

<sup>a</sup>Department of Materials and Optoelectronic Science, National Sun Yat-Sen University,  
Kaohsiung 80424, Taiwan

\*To whom correspondence should be addressed

E-mail: [ahmedelmahdy@mail.nsysu.edu.tw](mailto:ahmedelmahdy@mail.nsysu.edu.tw)

| <b>Section</b> | <b>Content</b>                                            | <b>Page No.</b> |
|----------------|-----------------------------------------------------------|-----------------|
| <b>S1</b>      | <b>Characterization</b>                                   | <b>S3</b>       |
| <b>S2</b>      | <b>Synthetic Procedures of monomers</b>                   | <b>S4</b>       |
| <b>S3</b>      | <b>Synthetic Procedures of CMPs</b>                       | <b>S7</b>       |
| <b>S4</b>      | <b>FTIR and NMR Spectral Profiles of Monomers</b>         | <b>S8</b>       |
| <b>S5</b>      | <b>FTIR Spectral Profiles of CMPs</b>                     | <b>S11</b>      |
| <b>S6</b>      | <b>Thermal gravimetric analysis of CMPs</b>               | <b>S13</b>      |
| <b>S7</b>      | <b>Powder X-ray diffraction of CMPs</b>                   | <b>S14</b>      |
| <b>S8</b>      | <b>X-ray photoelectron spectroscopy of CMPs</b>           | <b>S14</b>      |
| <b>S9</b>      | <b>Powder X-ray diffraction of CMPs after dye removal</b> | <b>S15</b>      |
| <b>S10</b>     | <b>Organic Pollutant Treatment in Water</b>               | <b>S16</b>      |
| <b>S11</b>     | <b>References</b>                                         | <b>S18</b>      |

## **S1. Characterization**

**Fourier-transform infrared spectroscopy (FTIR).** FTIR spectra were recorded using a Bruker Tensor 27 FTIR spectrophotometer and the conventional KBr plate method; 32 scans were collected at a resolution of 4  $\text{cm}^{-1}$ .

**Solid state nuclear magnetic resonance (SSNMR) spectroscopy.** SSNMR spectra were recorded using a Bruker Avance 400 NMR spectrometer and a Bruker magic-angle-spinning (MAS) probe, running 32,000 scans.

**Thermogravimetric analysis (TGA).** TGA was performed using a TA Q-50 analyzer under a flow of  $\text{N}_2$ . The samples were sealed in a Pt cell and heated from 40 to 800  $^{\circ}\text{C}$  at a heating rate of 20  $^{\circ}\text{C min}^{-1}$  under  $\text{N}_2$  at a flow rate of 50  $\text{mL min}^{-1}$ .

**Surface area and porosimetry (ASAP/BET).** The BET surface areas and porosimetry investigations of the prepared samples (ca. 20–100 mg) were conducted using a Micromeritics ASAP 2020 Surface Area and Porosity analyzer. Nitrogen isotherms were generated through incremental exposure to ultrahigh-purity  $\text{N}_2$  (up to ca. 1 atm) in a liquid  $\text{N}_2$  (77 K) bath.

**Field-emission scanning electron microscopy (FE-SEM).** FE-SEM was performed using a JEOL JSM-7610F scanning electron microscope. Samples were subjected to Pt sputtering for 100 s prior to observation.

**Transmission electron microscopy (TEM).** TEM was accomplished using a JEOL-2100 scanning electron microscope, operated at 200 kV.

**UV–Vis–NIR spectroscopy.** UV–Vis–NIR spectra were recorded at 25  $^{\circ}\text{C}$  using a Jasco V-570 spectrometer, with deionized water as the solvent. Raman spectra were recorded at 25  $^{\circ}\text{C}$  using a Jobin–Yvon T6400 micro Raman apparatus, with a He–Cd laser (325 nm line) as an excitation source.

## S2. Synthetic Procedures of Monomers

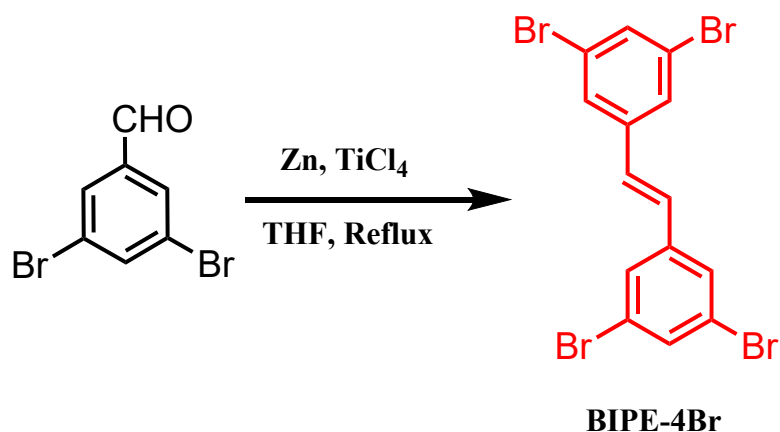

**Scheme S1.** Synthesis of 1,3,6,8-tetrabromopyrene (BIPE-4Br).

### Synthesis of (*E*)-1,2-bis(3,5-dibromophenyl)ethene (BIPE-4Br) [S1,S2]

In a dry 250 mL three-necked flask both of zinc metal (4.2 g, 64.2 mmol, 5.6 eq) and THF were charged (150 mL). The resulting suspension was allowed to cool to 0°C in an ice bath/acetone for 10 min. before the gradual addition of TiCl<sub>4</sub> (5.4 g, 3.2 mL, 28.2 mmol, 2.3 eq). Then, a calculated amount (3.0 g, 11.4 mmol, 1 eq) of 3,5-dibromobenzaldehyde was added and the mixture heated to reflux. 24 hrs. later, the reaction was cooled to ambient temperature (25°C) and tempered dropwise with water (20 mL). All solvents were eliminated by rotary evaporation, and extraction of the obtained solid was carried out using chloroform (3 x 250 mL). The extracted liquor was further concentrated by rotary evaporation, to give the desired solid which was sonicated with acetone (25 mL) and filtered, yielding (2.68 g, 5.41 mmol, 57 %) as a white crystalline solid. <sup>1</sup>H-NMR (300 MHz, CDCl<sub>3</sub>, δ): δ 7.58 (m, 2H, ph.), 7.55 (m, 4H, ph.), 6.93 (s, 2H, 2CH ethene); <sup>13</sup>C-NMR (75 MHz, CDCl<sub>3</sub>, δ): δ 140.03, 133.63, 128.62, 128.51, 123.51. MS (HR-EI), m/z calcd. C<sub>14</sub>H<sub>8</sub>Br<sub>4</sub> [M]<sup>+</sup> 495.7319, found 495.7318.

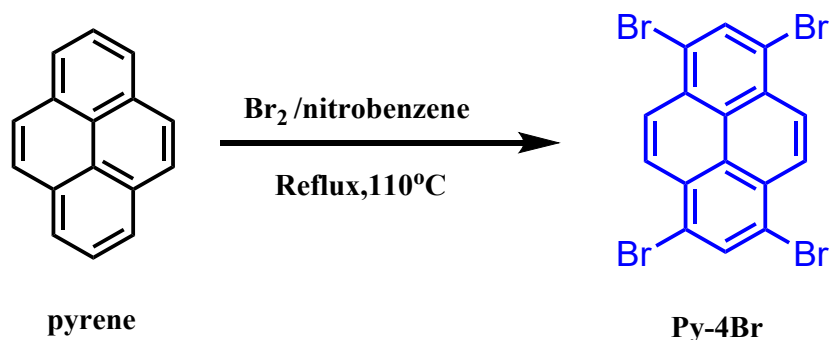

**Scheme S2.** Synthesis of 1,3,6,8-tetrabromopyrene (Py-4Br).

### Synthesis of 1,3,6,8-Tetrabromopyrene (Py-4Br) [S3].

Bromine's solution (2.3 mL, 44 mmol) in nitrobenzene (20 mL) was added to pyrene's solution (2.00 g, 10 mmol) in nitrobenzene (20 mL). Then the obtained mixture was heated under reflux for a period of 4 h at 120 °C till appearance of a green precipitate. This solid was washed with ethanol, filtered off, and dried under vacuum at 50 °C to give the desired Py-Br<sub>4</sub> (4.4 g, 89%). FTIR (KBr, cm<sup>-1</sup>): 3053 (aromatic C-H stretching), 682 (C-Br stretching).

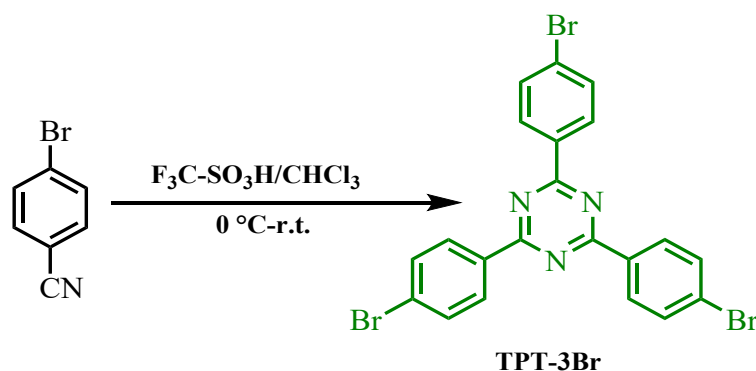

**Scheme S3.** Synthesis of 2,4,6-tris(4-bromophenyl)-1,3,5-triazine (TPT-3Br).

### Synthesis of 2,4,6-tris(4-bromophenyl)-1,3,5-triazine (TPT-3Br) [S4,S5]

A solution of 4-bromobenzonitrile (1.5 g, 8.24 mmol) in dry chloroform (20 mL) under nitrogen atmosphere was cooled to 0 °C and then trifluoromethanesulfonic acid (4 mL, 0.045 mmol) was added gradually in small portions. The previous solution was stirred for 0.5 h. at 0 °C before warming to room temperature. Stirring was continued for an additional 20 h at room temperature, subsequently, the reaction mixture was poured into ice-water (50 mL), and

neutralization using sodium carbonate ( $\text{Na}_2\text{CO}_3$ ) was carried out. The solid gained was gathered by filtration and dried overnight under vacuum to produce a white solid of TPT- $\text{Br}_3$ . FT-IR (powder): 1578, 1518, 1400, 1372, 1173, 1069, 1011, 843, 806, 498  $\text{cm}^{-1}$ .  $^1\text{H-NMR}$  (500 MHz,  $\text{CDCl}_3$ ,  $\delta$ ): 8.60 (d,  $J = 8.5$  Hz, 6H), 7.70 (d,  $J = 8.5$  Hz, 6H).  $^{13}\text{C-NMR}$  (125 MHz,  $\text{CDCl}_3$ ,  $\delta$ ): 171.22, 134.91, 132.01, 130.48, 127.88.

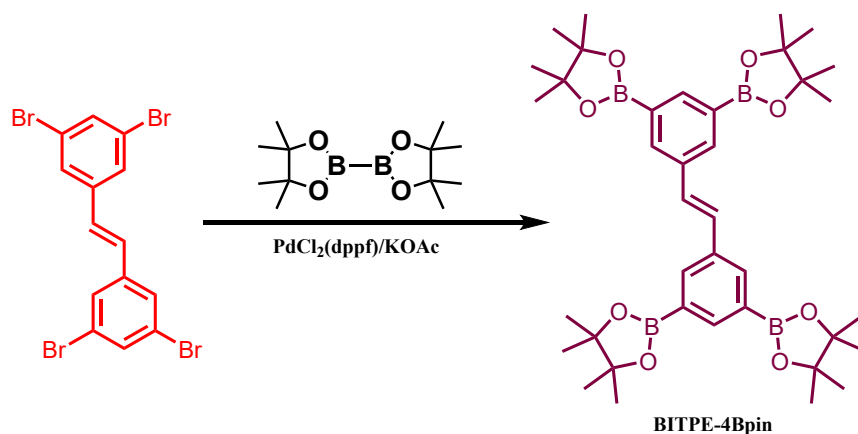

**Scheme S4.** Synthesis of (*E*)-1,2-bis(3,5-bis(4,4,5,5-tetramethyl-1,3,2-dioxaborolan-2-yl)phenyl)ethene (BITPE-4Bpin)

#### Synthesis of (*E*)-1,2-bis(3,5-bis(4,4,5,5-tetramethyl-1,3,2-dioxaborolan-2-yl)phenyl)ethene (BITPE-4Bpin)

In a dried and cleaned 100 mL two neck-bottle, a mix of (*E*)-1,2-bis(3,5-dibromophenyl)ethene (BIPE-4Br) (1.0 g, 5.8 mmol), bis(pinacolato)-diboron (3.06 g, 34.7 mmol), potassium acetate (1.217 g, 35.7 mmol), and 1,1'-Bis(diphenylphosphino)ferrocene]dichloropalladium (II) (0.127 g, 0.50 mmol) in *p*-dioxane (50 mL) was heated at 100 °C under nitrogen atmosphere for 2 days. Then, the reaction mixture was allowed to cool to room temperature, to be poured into iced-water. The formed precipitate was collected by extraction with dichloromethane and dried under vacuum overnight. The residue was purified by flash chromatographically ( $\text{SiO}_2$ ; THF/Hexane = 1:4) to provide a white solid (0.56 g, 75.0%). FTIR (KBr,  $\text{cm}^{-1}$ ): 3112, 2980, 1596, 1324.  $^1\text{H-NMR}$  ( $\text{CDCl}_3$ , 25 °C, 500 MHz): 8.06-8.15 (m, 6H), 7.24 (d, 2H), 1.36 (s, 48H).  $^{13}\text{C-NMR}$  ( $\text{CDCl}_3$ , 25 °C, 125 MHz): 140.20, 135.75, 128.41, 83.52, 24.31.

### S3. Synthetic Procedures of CMPs

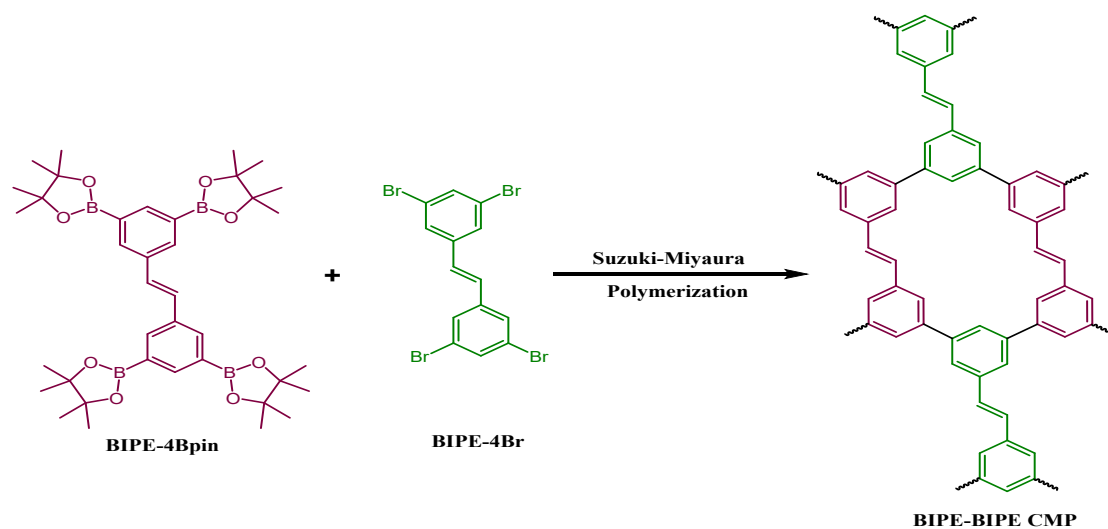

**Scheme S5.** Synthesis of BIPE-BIPE-CMP.

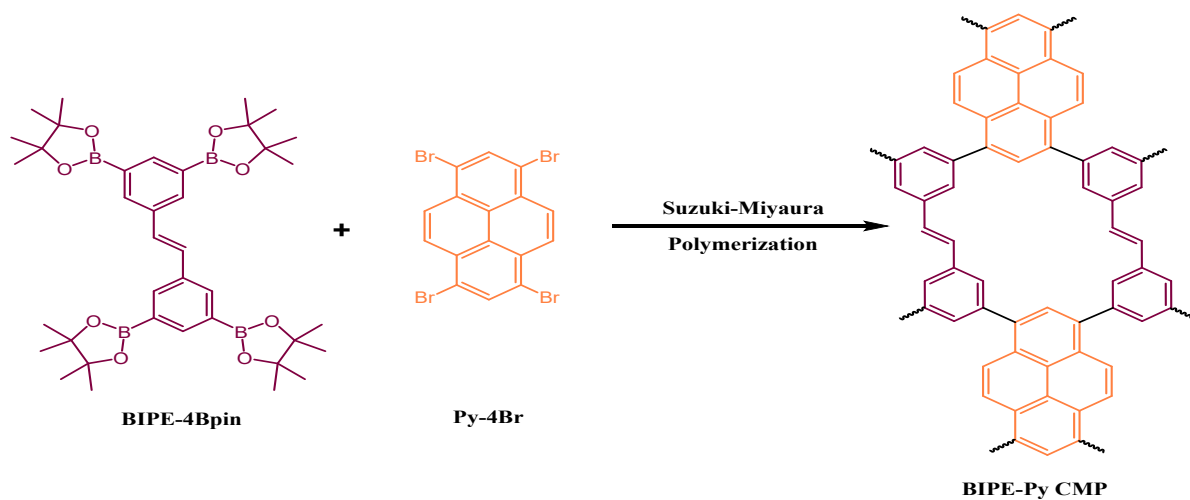

**Scheme S6.** Synthesis of BIPE-Py-CMP.

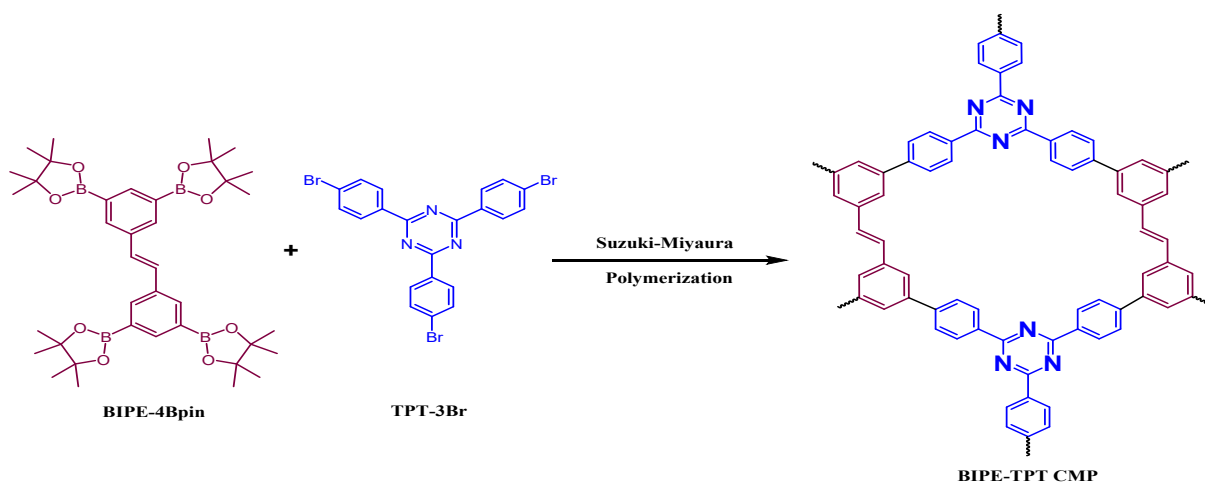

**Scheme S7.** Synthesis of BIPE-TPT CMP.

#### S4. FTIR and NMR Spectral Profiles of Monomers

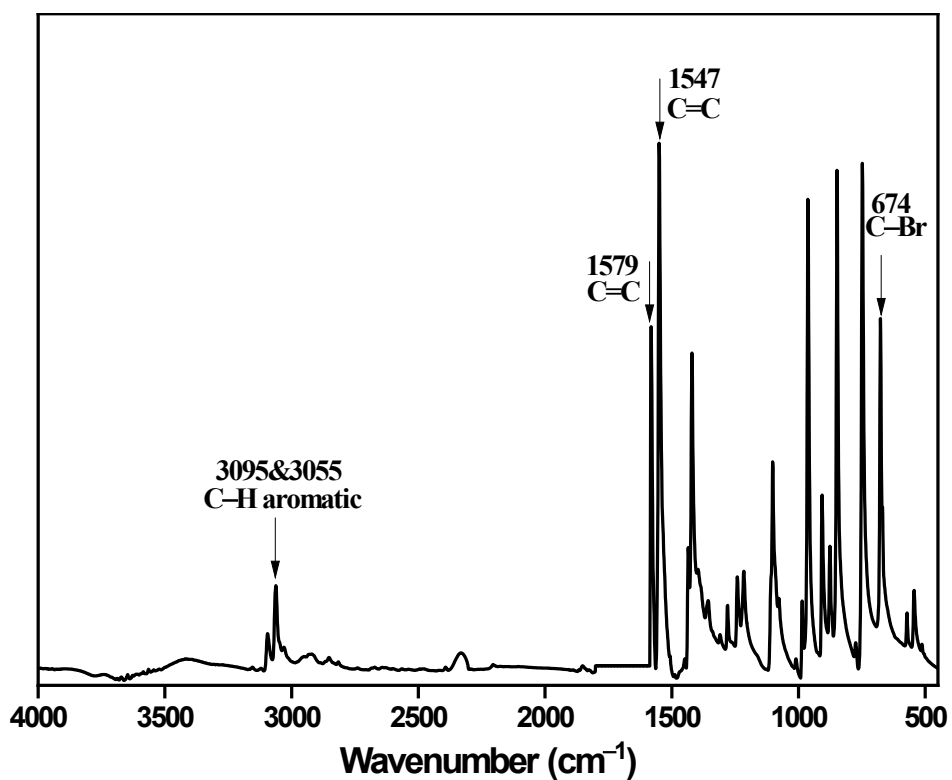

Fig. S1 FTIR spectrum of (*E*)-1,2-bis(3,5-dibromophenyl)ethene (BIPE-4Br).

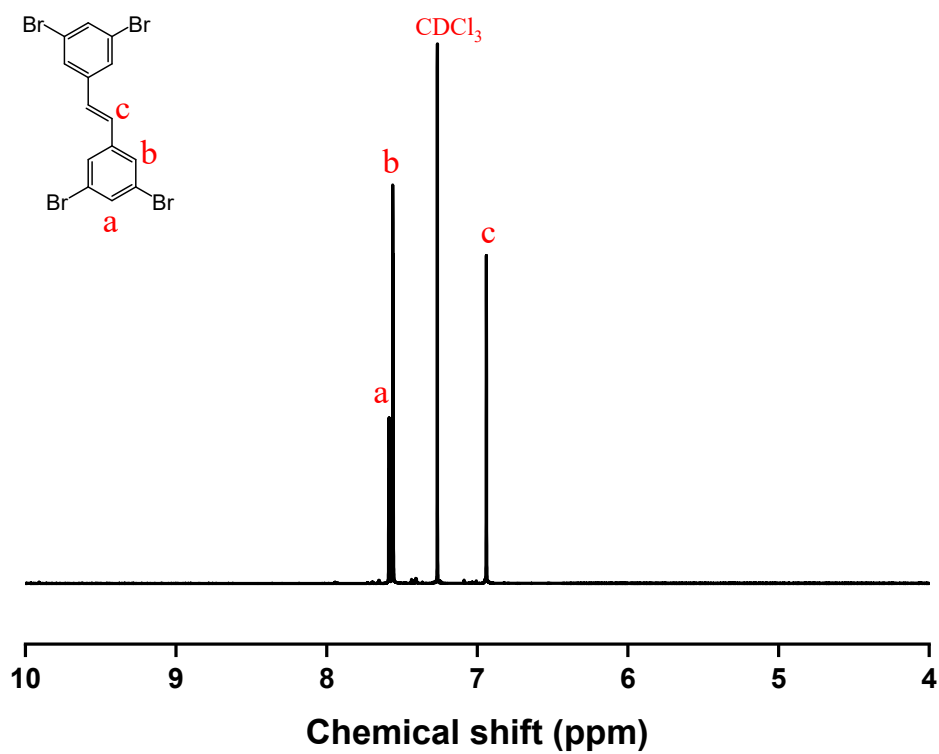

Fig. S2 <sup>1</sup>H NMR spectrum of (*E*)-1,2-bis(3,5-dibromophenyl)ethane (BIPETH-4Br).



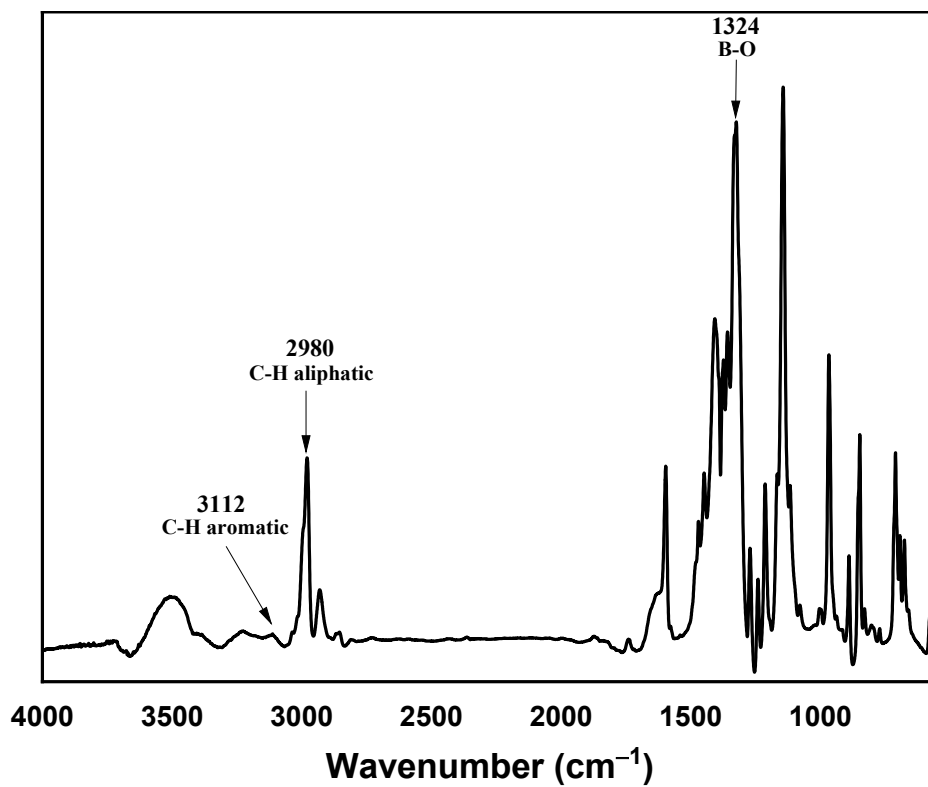

Fig. S3 FTIR spectrum of (*E*)-1,2-bis(3,5-bis(4,4,5,5-tetramethyl-1,3,2-dioxaborolan-2-yl)phenyl)-ethene (BITPE-4Bpin).

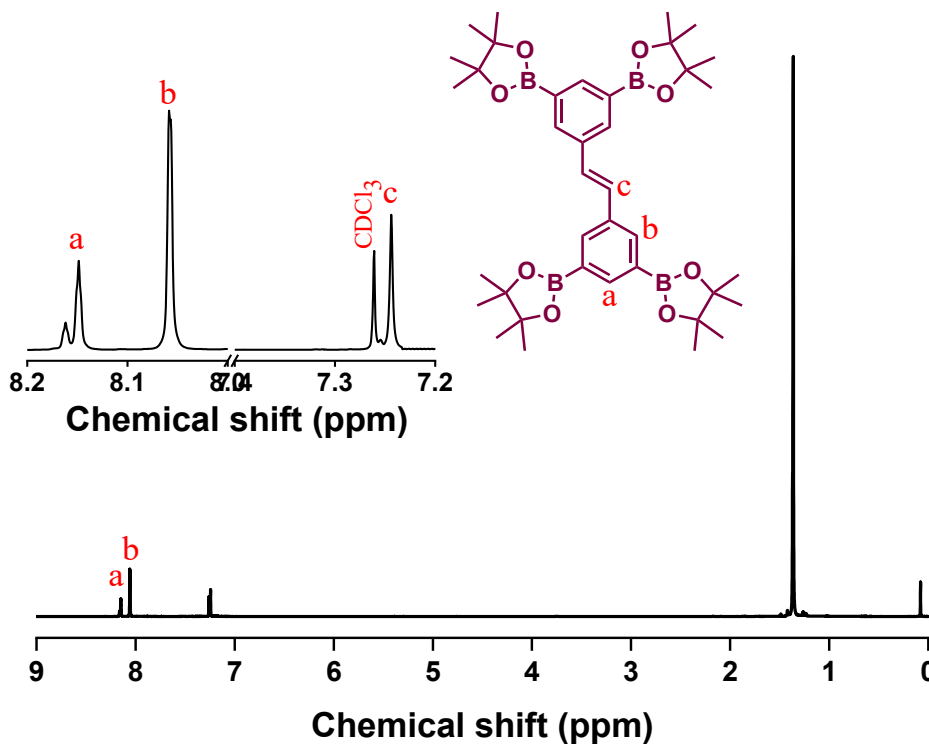

Fig. S4 <sup>1</sup>H NMR spectrum of (*E*)-1,2-bis(3,5-bis(4,4,5,5-tetramethyl-1,3,2-dioxaborolan-2-yl)phenyl)-ethene (BITPE-4Bpin).

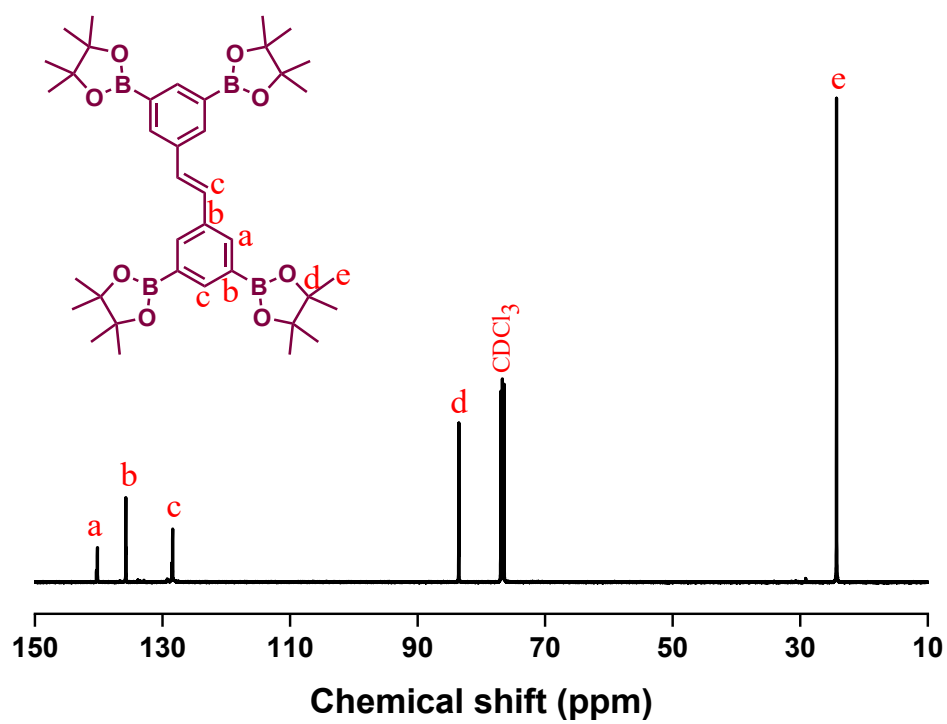

**Fig. S5** <sup>13</sup>C NMR spectrum of (*E*)-1,2-bis(3,5-bis(4,4,5,5-tetramethyl-1,3,2-dioxaborolan-2-yl)phenyl)-ethene (BITPE-4Bpin).

## S5. FTIR Spectral Profiles of CMPs

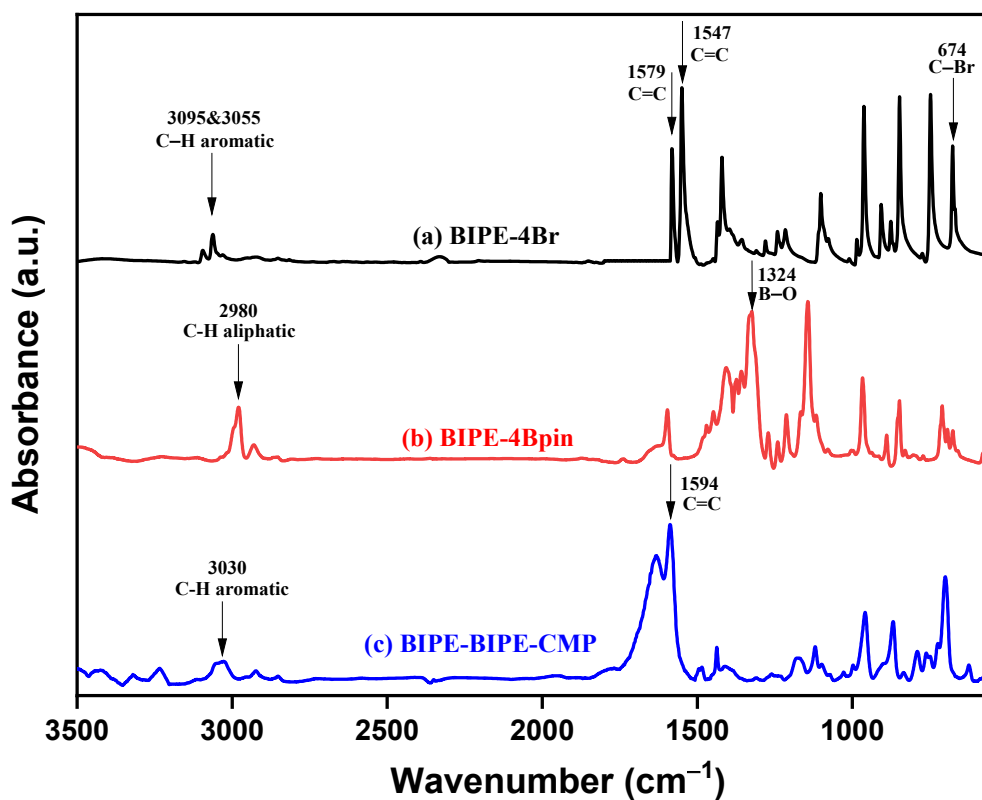

Fig. S6 FTIR spectra of (a) BIPE-4Br, (b) BIPE-4Bpin, and (c) BIPE-BIPE-CMP.

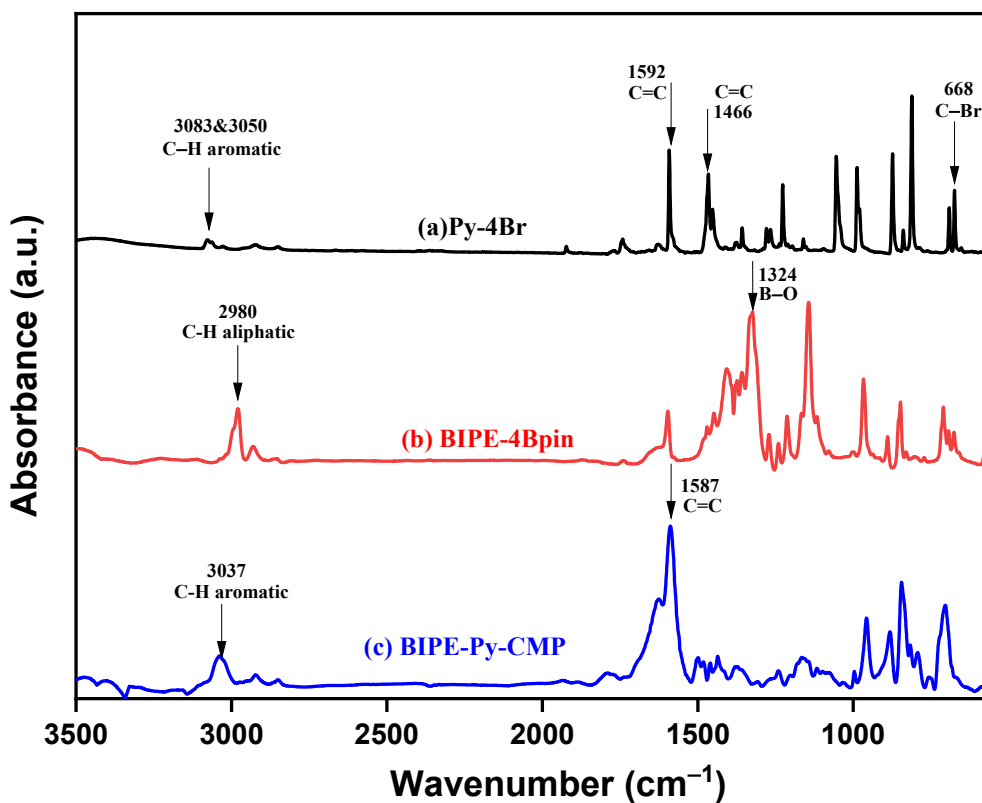

Fig. S7 FTIR spectra of (a) Py-4Br, (b) BIPE-4Bpin, and (c) BIPE-Py-CMP.

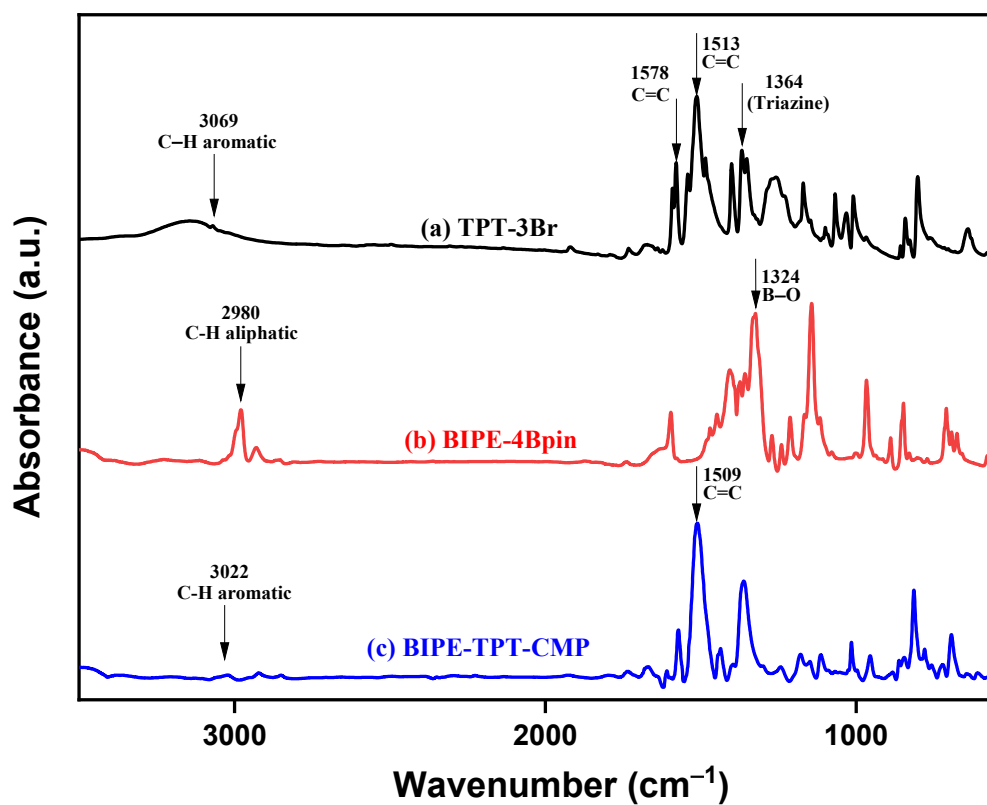

Fig. S8 FTIR spectra of (a) TPT-3Br, (b) BIPE-4Bpin, and (c) BIPE-TPT-CMP.

## S6. Thermal gravimetric analysis of CMPs

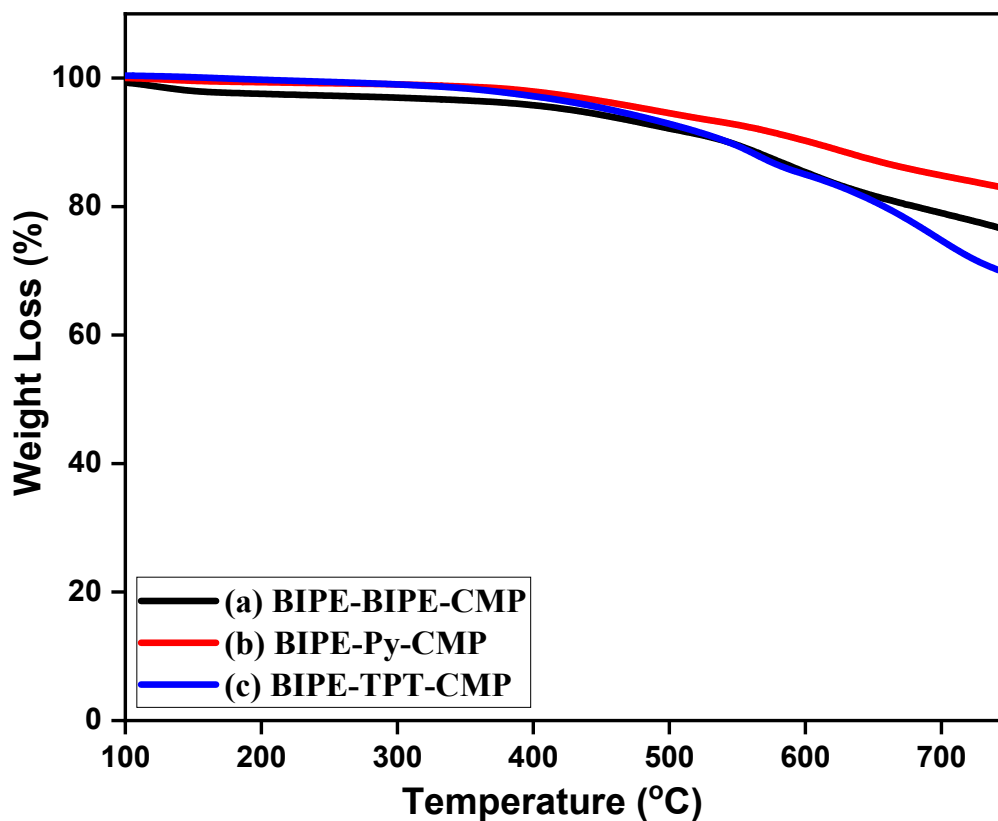

**Fig. S9** TGA curves of (a) BIPE-BIPE-CMP, (b) BIPE-Py-CMP, and (c) BIPE-TPT-CMP.

**Table S1.** Values of  $T_{d10\%}$  and Char yield of CMPs.

|               | $T_{d5\%}$ (°C) | $T_{d10\%}$ (°C) | Char yield (%) |
|---------------|-----------------|------------------|----------------|
| BIPE-BIPE-CMP | 429             | 543              | 74             |
| BIPE-Py-CMP   | 488             | 604              | 81             |
| BIPE-TPT-CMP  | 457             | 543              | 67             |

## S7. Powder X-ray diffraction of CMPs

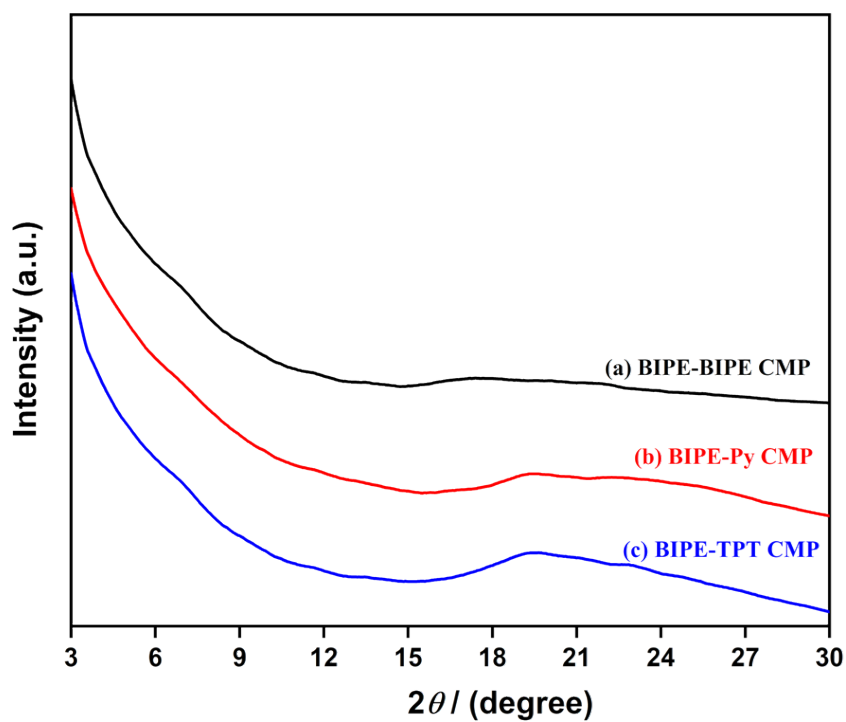

**Fig. S10** powder X-ray diffraction patterns of (a) BIPE-BIPE-CMP, (b) BIPE-Py-CMP, and (c) BIPE-TPT-CMP.

## S8. X-ray photoelectron spectroscopy of CMPs

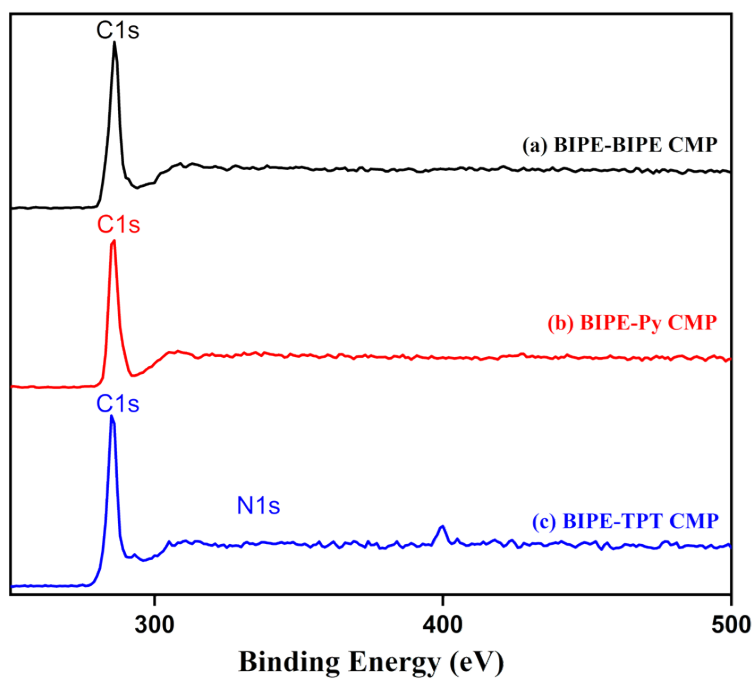

**Fig. S11** XPS spectra of (a) BIPE-BIPE-CMP, (b) BIPE-Py-CMP, and (c) BIPE-TPT-CMP.

## S9. Powder X-ray diffraction of CMPs after dye removal

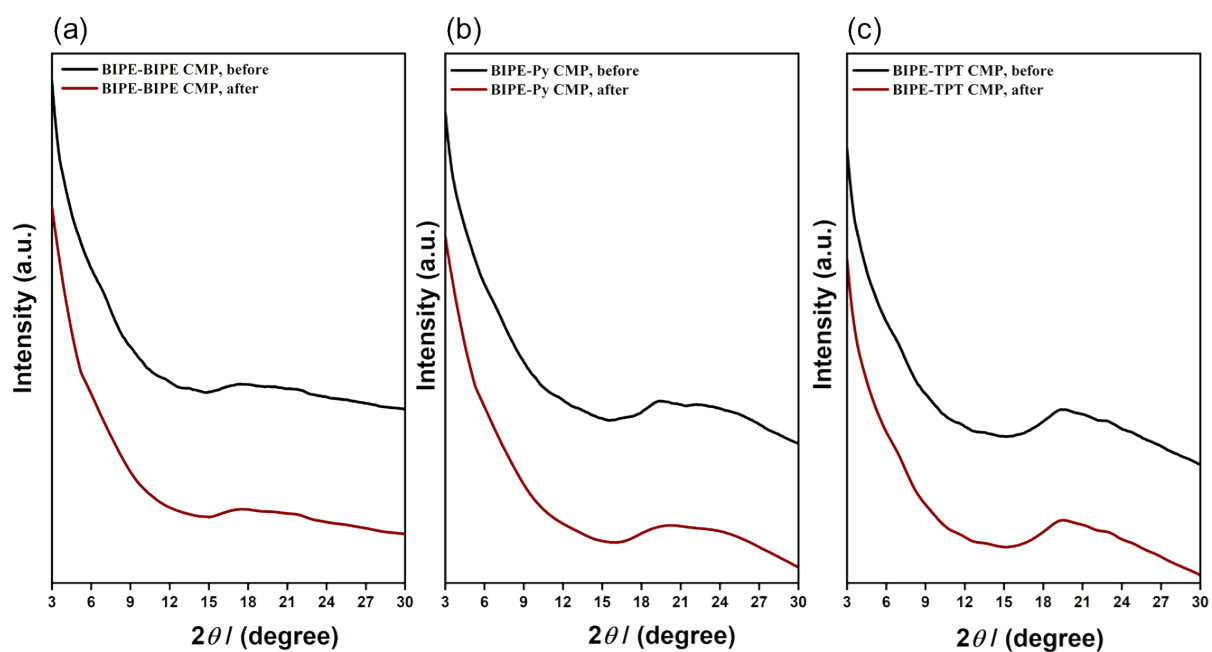

**Fig. S12** powder X-ray diffraction patterns of (a) BIPE-BIPE-CMP, (b) BIPE-Py-CMP, and (c) BIPE-TPT-CMP before and after the sixth regeneration cycle.

## S10. Organic Pollutant Treatment in Water

**Table S2.** Maximum adsorption capacities of RhB on the BIPE-BIPE, BIPE-Py, and BIPE-TPT CMPs, compared with those of other reported materials.

| Adsorbent                        | Dye | $Q_m$ (mg g <sup>-1</sup> ) | BET(m <sup>2</sup> g <sup>-1</sup> ) | Amount/dye conc.                                        | Temperature | pH         | Ref.             |
|----------------------------------|-----|-----------------------------|--------------------------------------|---------------------------------------------------------|-------------|------------|------------------|
| Graphene sponge                  | RhB | 72                          | 150                                  | 2 mg ml <sup>-1</sup> /95 mg l <sup>-1</sup>            | 298         | .....      | S6               |
| Nanoporous PDVB-VI-0.2           | RhB | 260                         | 737                                  | 0.5 mg ml <sup>-1</sup> /50 mg l <sup>-1</sup>          | 298-318     | 3-11       | S7               |
| S1                               | RhB | 200                         | 48.6                                 | 0.08 mg ml <sup>-1</sup> /40 mg l <sup>-1</sup>         | 298         | .....      | S8               |
| activated carbon (OAC)           | RhB | 312-409                     | 543                                  | 0.1-1.5 mg ml <sup>-1</sup> /100-450 mg l <sup>-1</sup> | 298-318     | 1.63-10.31 | S9               |
| Mesoporous carbon (ST-A)         | RhB | 83-100                      | 670                                  | 0.03-0.7 mg ml <sup>-1</sup> /30-310 mg l <sup>-1</sup> | 298-315     | .....      | S10              |
| N-doped mesoporous gyroid carbon | RhB | 204                         | 491                                  | 0.5 mg ml <sup>-1</sup> /12.5-150 mg l <sup>-1</sup>    | 298         | .....      | S11              |
| CMP-YA                           | RhB | 535                         | 1410                                 | 0.2 mg ml <sup>-1</sup> /25 mg l <sup>-1</sup>          | 298         | .....      | S12              |
| Py-BF-CMP                        | RhB | 1905                        | 1306                                 | 0.2 mg ml <sup>-1</sup> /25 mg l <sup>-1</sup>          | 298         | .....      | S13              |
| TPE-BF-CMP                       | RhB | 1024                        | 777                                  | 0.2 mg ml <sup>-1</sup> /25 mg l <sup>-1</sup>          | 298         | .....      | S13              |
| TPA-BF-CMP                       | RhB | 926                         | 590                                  | 0.2 mg ml <sup>-1</sup> /25 mg l <sup>-1</sup>          | 298         | .....      | S13              |
| Ttba-TPDA-COF                    | RhB | 833                         | 726                                  | 0.5 mg ml <sup>-1</sup> /20-800 mg l <sup>-1</sup>      | 298         | 2-11       | S14              |
| CuP-DMNDA-COF/Fe                 | RhB | 378-429                     | 273                                  | 0.25 mg ml <sup>-1</sup> /16 mg l <sup>-1</sup>         | 293-313     | .....      | S15              |
| BIPE-BIPE                        | RhB | 352                         | 918                                  | 0.4 mg ml <sup>-1</sup> /25 mg l <sup>-1</sup>          | 298         | .....      | <b>This work</b> |
| BIPE-Py                          | RhB | 1027                        | 1400                                 | 0.4 mg ml <sup>-1</sup> /25 mg l <sup>-1</sup>          | 298         | .....      | <b>This work</b> |
| BIPE-TPT                         | RhB | 739                         | 903                                  | 0.4 mg ml <sup>-1</sup> /25 mg l <sup>-1</sup>          | 298         | .....      | <b>This work</b> |



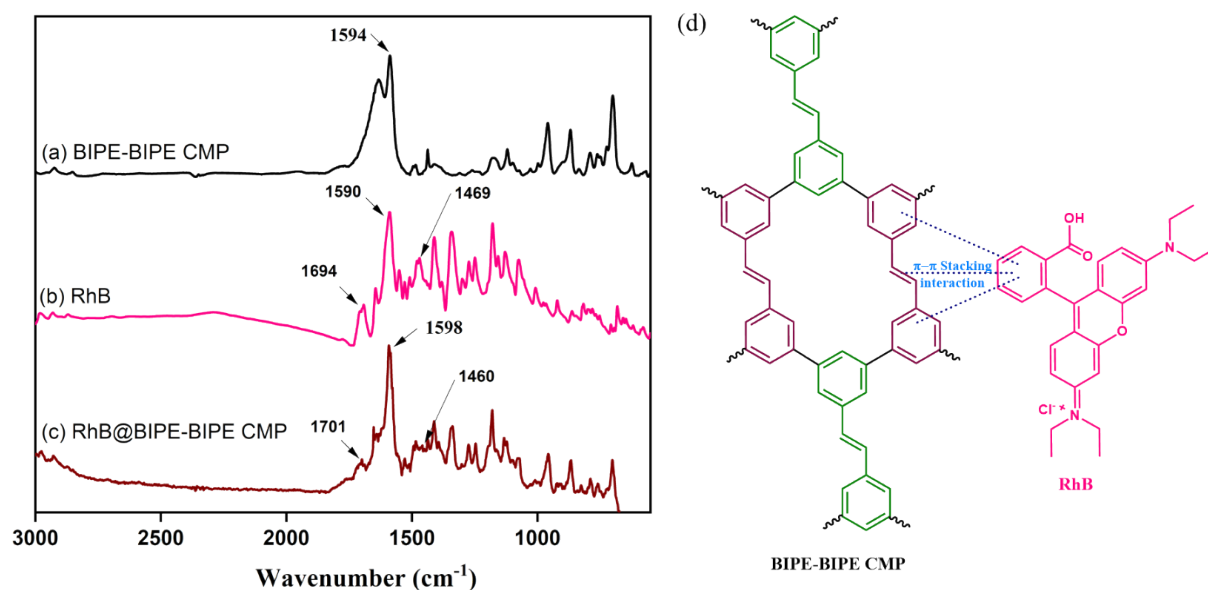

**Fig. S13** FT-IR spectra of (a) BIPE-BIPE CMP, (b) rhodamine B (RhB), and (c) BIPE-BIPE CMP after adsorbed rhodamine B. (d) Adsorption mechanism of rhodamine B on BIPE-BIPE CMP.

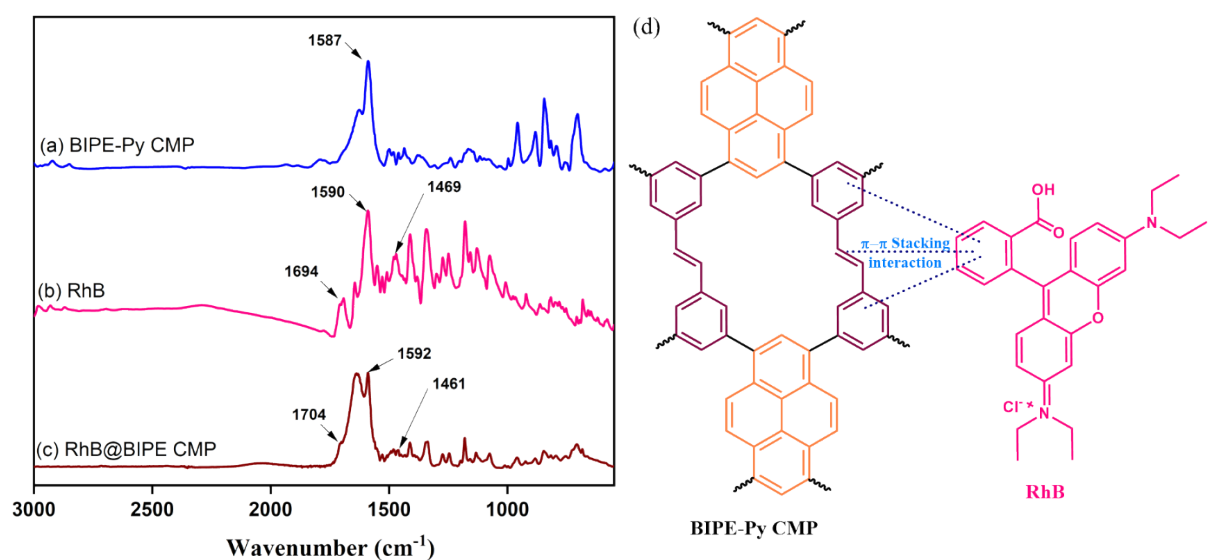

**Fig. S14** FT-IR spectra of (a) BIPE-Py CMP, (b) rhodamine B (RhB), and (c) BIPE-Py CMP after adsorbed rhodamine B. (d) Adsorption mechanism of rhodamine B on BIPE-Py CMP.

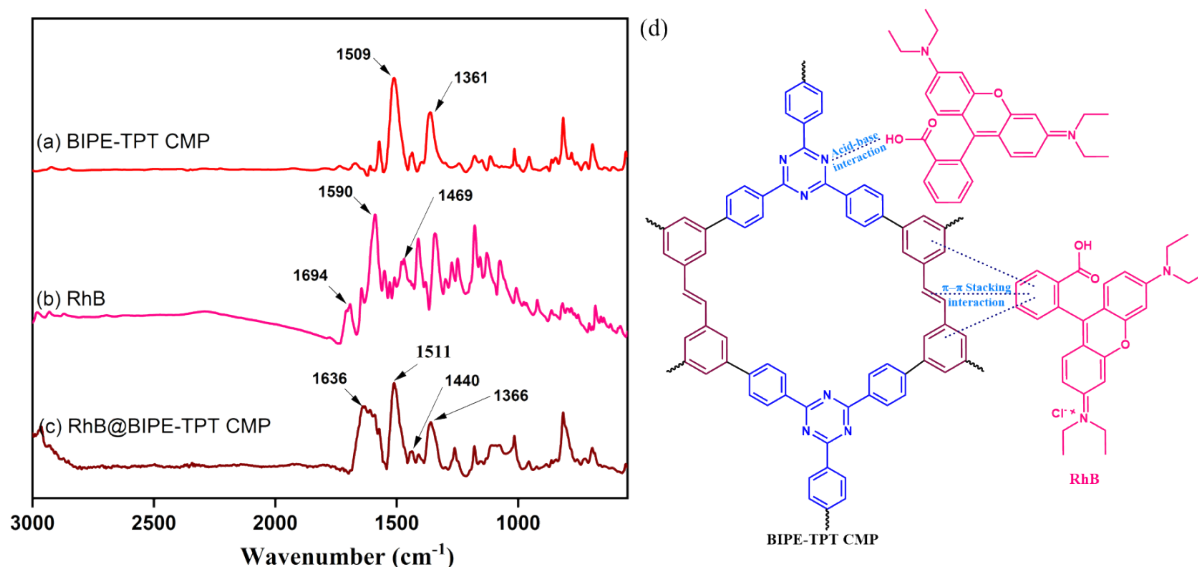

**Fig. S15** FT-IR spectra of (a) BIPE-TPT CMP, (b) rhodamine B (RhB), and (c) BIPE-TPT CMP after adsorbed rhodamine B. (d) Adsorption mechanism of rhodamine B on BIPE-TPT CMP.

## S11. References

- [S1] B. Das, K. Vankateswarlu, A. Majhi, V. Siddaiah and K. R. Reddy, *J. Mol. Catal.*, 2007, **267**, 30-33.
- [S2] A. Raman, G. Augustine, N. Ayyadurai and S. Easwaramoorthi, *J. Mater. Chem. C*, 2018, **6**, 10497-10501.
- [S3] M. G. Mohamed, M. H. Elsayed, A. M. Elewa, A. F. EL-Mahdy, C.-H. Yang, A. A. K. Mohammed, H-H. Chou and S.-W. Kuo, *Catal. Sci. Technol.*, 2021, **11**, 2229-2241.
- [S4] A. F. M. EL-Mahdy, C. H. Kuo, A. Alshehri, C. Young, Y. Yamauchi, J. Kim and S. W. Kuo, *J. Mater. Chem. A*, 2018, **6**, 19532-19541.
- [S5] A. F. M. EL-Mahdy, C. Young, J. Kim, J. You, Y. Yamauchi and S. W. Kuo, *ACS Appl. Mater. Interfaces*, 2019, **11**, 9343-9354.
- [S6] J. Zhao, W. Ren and H. M. Cheng, *J. Mater. Chem.*, 2012, **22**, 20197-20202.
- [S7] Y. Han, W. Li, J. Zhang, H. Meng, Y. Xu and X. Zhang, *RSC Adv.*, 2015, **5**, 104915-104922.
- [S8] S. Wang, B. Yang and Y. Liu, *J. Colloid Interface Sci.*, 2017, **507**, 225-233.
- [S9] O. Üner, Ü. Geçgel, H. Kolancılar and Y. Bayrak, *Chem. Eng. Commun.*, 2017, **204**, 772-783.
- [S10] K. Jedynak, D. Wideł and N. Redzia, *Colloids Interfaces*, 2019, **3**, 30.
- [S11] A. F. M. EL-Mahdy, T. E. Liu and S. W. Kuo, *J. Hazard. Mater.*, 2020, **391**, 122163.
- [S12] Y. Yuan, H. Huang, L. Chen and Y. Chen, *Macromolecules*, 2017, **50**, 4993-5003.
- [S13] B. Wang, Z. Xie, Y. Li, Z. Yang and L. Chen, *Macromolecules*, 2018, **51**, 3443-3449.
- [S14] T. Xu, S. An, C. Peng, J. Hu and H. Liu, *Ind. Eng. Chem. Res.*, 2020, **59**, 8315-8322.
- [S15] Y. Hou, X. Zhang, C. Wang, D. Qi, Y. Gu, Z. Wang and J. Jiang, *New J. Chem.*, 2017, **41**, 6145-6151.
